# Supplementary material for: Plasma Metabolomics Study in Lung Cancer Screening and Differential Diagnosis
Source: Research Square preprint supplement (doi:10.21203/rs.3.rs-190217/v1), 2021-02-18
Supplement: Supplementary file 3 [file 6f7a6ec73ad5b98994bfa37c.docx]

***Table S1*** ***Comparison of General Characteristics***

|  | **The Testing Part** | | | |  | **The Validation Part** | |
| --- | --- | --- | --- | --- | --- | --- | --- |
| **PMC** | **BPN** | **PLC** | **HPG** |  | **PLC** | **HPG** |
| Sample Size | 16 | 32 | 80 | 48 |  | 80 | 48 |
| Gender(M/F) | 12:4 | 24:8 | 57:23 | 35:13 |  | 52:28 | 36:12 |
| Age | 55.2±8.9 | 56.3±8.9 | 55.0±9.2 | 53.2±9.2 |  | 55.4±7.9 | 50.7±9.2 |

***Table S2 General Characteristics of Primary Lung Cancer in Testing and Validation Part***

|  | **PLC in Testing Part**  **（n=80）** | **PLC in Validation Part**  **（n=80）** | ***P* value** |
| --- | --- | --- | --- |
| Smoking History  No  Yes | 47（58.8%）  33（41.2%） | 47（58.8%）  33（41.2%） | 1.000 |
| Comorbidity  None  Hypertension  Type 2 Diabetes  Both  Hepatitis  Others | 53（66.3%）  18（22.4%）  4（5.0%）  2（2.5%）  3（3.8%）  0（0%） | 53（66.3%）  16（20.0%）  1（1.3%）  4（5.0%）  4（5.0%）  2（2.5%） | 0.450 |
| History of Malignancy  None  Rectal Cancer  Thyroid Cancer  Lung Cancer  Colon Cancer  Breast Cancer  Ovarian Cancer  Endometrial Cancer  Bladder Cancer | 72（90.0%）  1（1.3%）  1（1.3%）  3（3.8%）  1（1.3%）  2（2.5%）  0（0%）  0（0%）  0（0%） | 73（91.3%）  0（0%）  1（1.3%）  2（2.5%）  0（0%）  1（1.3%）  1（1.3%）  1（1.3%）  1（1.3%） | 0.699 |
| Neoadjuvant Therapy  None  Chemotherapy  Chemo-immunotherapy  Targeted Therapy | 76（95.0%）  3（3.8%）  1（1.3%）  0（0%） | 77（96.3%）  2（2.5%）  0（0%）  1（1.3%） | 0.531 |
| Pathological Types  Adenocarcinoma  Squamous Carcinoma  Small Cell Lung Cancer  Carcinoid  Carcinosarcoma  Large Cell Lung Cancer | 67（83.8%）  8（10.0%）  2（2.5%）  2（2.5%）  0（0%）  1（1.3%） | 64（80.0%）  12（15.0%）  2（2.5%）  1（1.3%）  1（1.3%）  0（0%） | 0.669 |
| Pathological Stage  Stage 0  Stage I  Stage II  Stage III  Stage IV | 12（15.0%）  47（58.8%）  7（8.8%）  12（15.0%）  2（2.5%） | 9（11.3%）  56（70.0%）  3（3.8%）  11（13.8%）  1（1.3%） | 0.526 |

***Table S3 Feature Parameters of Comparisons among Groups Based on OPLS-DA Model***

|  | **Four**  **Groups** | **PMC vs**  **HPG** | **BPN vs**  **HPG** | **PLC vs**  **HPG** | **Three**  **Groups** | **PLC vs**  **BPN** | **PMC vs**  **BPN** | **PMC vs**  **PLC** |
| --- | --- | --- | --- | --- | --- | --- | --- | --- |
| R2X | 0.540 | 0.638 | 0.564 | 0.607 | 0.533 | 0.525 | 0.654 | 0.531 |
| R2Y | 0.624 | 0.983 | 0.968 | 0.957 | 0.704 | 0.907 | 0.956 | 0.976 |
| Q2 | 0.598 | 0.939 | 0.947 | 0.938 | 0.625 | 0.849 | 0.787 | 0.949 |
